# Supplementary material
Source: Springer Nature journal article supplement (https://www.springermedizin.de/resource/supplementary/12933_2012_515_MOESM4_ESM.pdf/9538396)

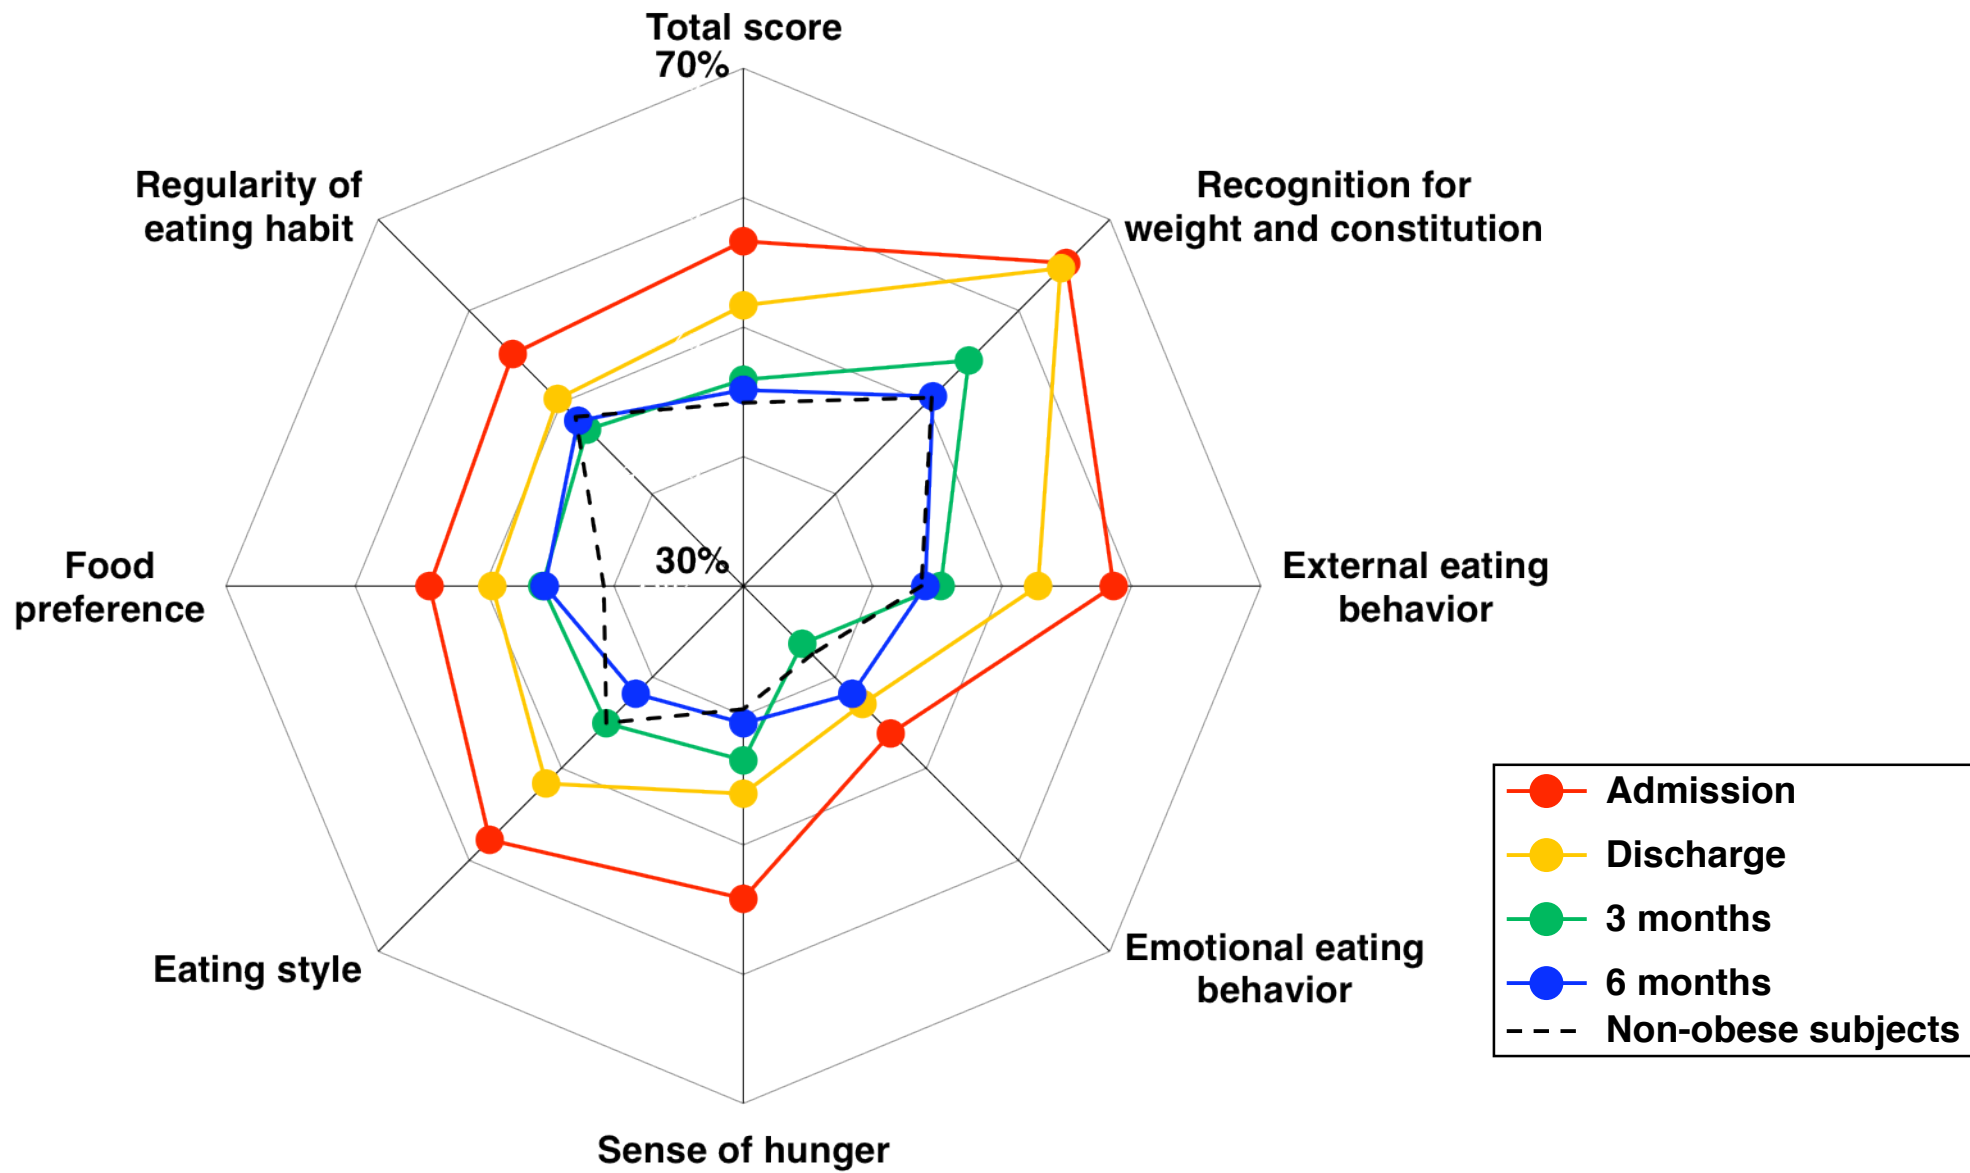

Figure 3

Supplement: MOESM4 [file 9538396]
